# Supplementary material for: Effects of CB1 receptor negative allosteric modulator Org27569 on oxycodone withdrawal symptoms in mice
Source: Springer Nature journal article supplement (doi:10.1007/s00213-024-06591-z), 2024-04-27

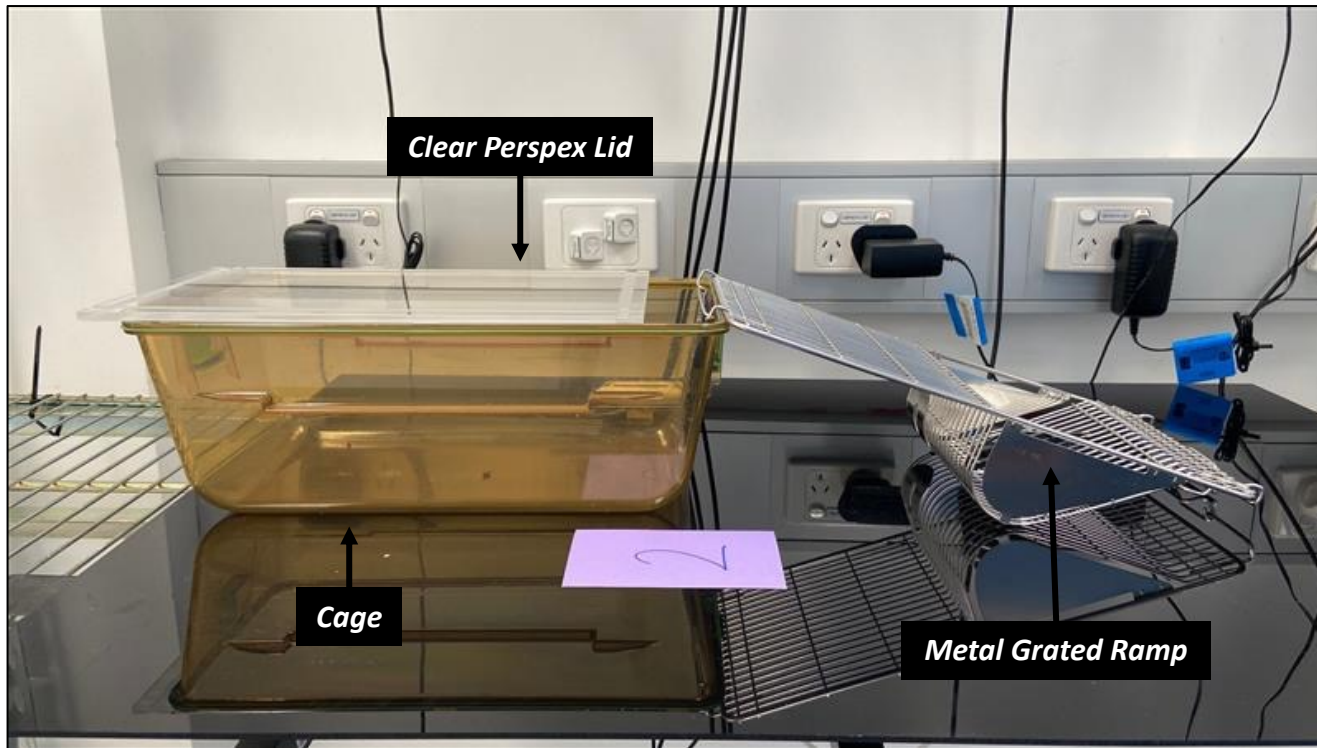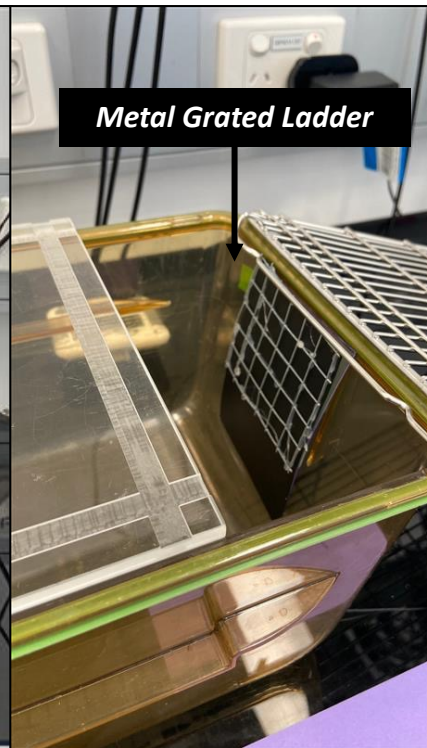

Supplement: MOESM1 [file 213_2024_6591_MOESM1_ESM.pdf]
